# Supplementary material for: Hyperoxemia Among Ventilated children and its Impact on Outcome in A Tertiary Care Hospital
Source: Research Square preprint supplement (doi:10.21203/rs.3.rs-7113968/v1), 2025-08-19
Supplement: Supplementary file 1 [file c1afec99ba476bac6551e8a6.docx]

Supplement :

CEOE define :

Cumulative excess oxygen exposure” (CEOE)—previously de f ined as the mean hourly administered Fio2 above 0.21 when the corresponding hourly Spo2 was 95% or above

We divided the quartiles into 4 sub classes as

Quartile 1 : < 9 %

Quartile 2 : 9-13 %

Quartile 3 : 13-19%

Quartile 4 : >19%

Afor example if someone is receiving fio2 of 0.40 for which saturations are above 95% for more then 12 hours then the patient is having CEOE of 19 % and so on.
